# Supplementary material for: Simian Varicella Virus Pathogenesis in Skin during Varicella and Zoster
Source: MDPI journal article supplement (doi:10.3390/v14061167), 2022-05-27
Supplement: s1 [file s1]

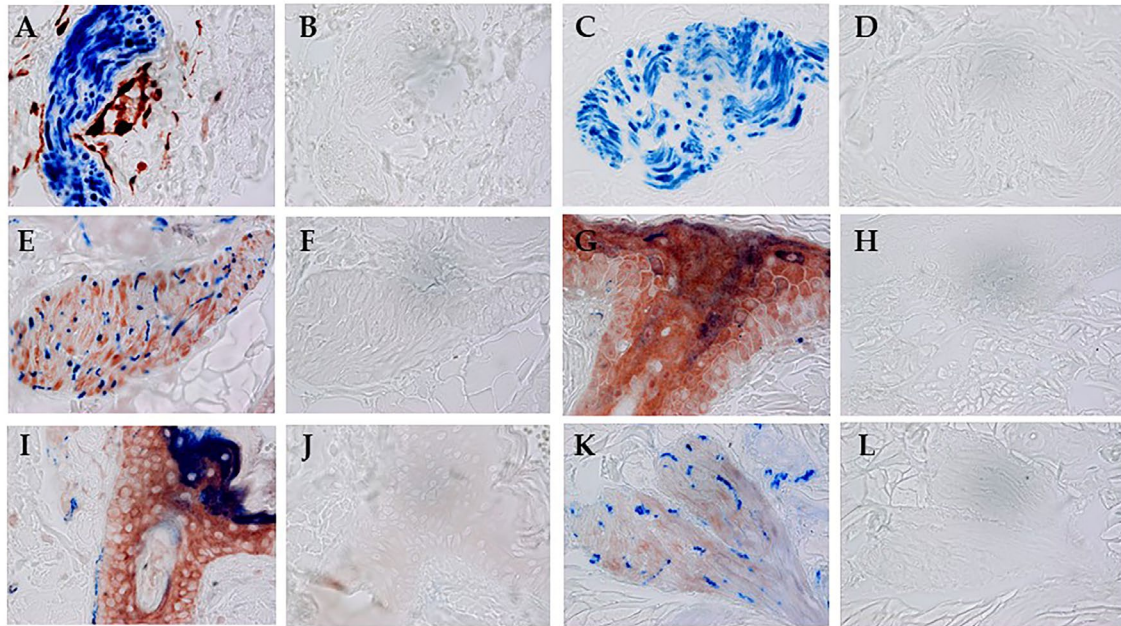

**Supplementary Figure S1.** Detection of SVV IE63 protein and  $\beta$ III-tubulin in epidermis and nerve bundles in skin during varicella and zoster in rhesus macaques. Skin sections from acutely infected monkey B321(A, B), uninfected monkey R110368 (C, D), LR70, 9 dpi (E, F), 45 dpx (G, H), LB56, 9dpi (I, J) and 49 dpx (K, L) were analyzed by immunohistochemistry using either polyclonal antibody raised against SVV IE63 protein and mouse anti  $\beta$ III-Tubulin antibody (A, C, E, G, I, K) or normal rabbit serum and mouse anti isotype IgG2a antibody (B, D, F, H, J, L) as described in methods. SVV IE63 protein (Brown) can be seen in close in close proximity to nerve bundles (blue) in skin sections from acutely infected monkey B321(A), in skin during varicella in LR70 (I) and during zoster in LB 56 (K).  $\beta$ III-tubulin containing nerve bundles but not SVV IE63 protein were seen in skin from the uninfected monkey R110368 (C). SVVIE63 protein was also found to be colocalized in epidermal cells in skin during varicella in LB56 (I) and during zoster in LR70 (G). Normal rabbit serum along with mouse anti IgG2a antibody did not show positive staining in any of the skin sections (B, D, F, H, J, L) (Magnification ,  $\times 60$ ).
